# Supplementary material for: In vitro treatment of 3 T3-L1 adipocytes with recombinant Calcium/calmodulin-dependent Protein Kinase IV (CaMKIV) limits ER stress and improves insulin sensitivity through inhibition of autophagy via the mTOR/CREB signaling pathway
Source: Springer Nature journal article supplement (doi:10.1186/s12902-020-00589-2), 2020-07-13
Supplement: MOESM1 [file 18178054]

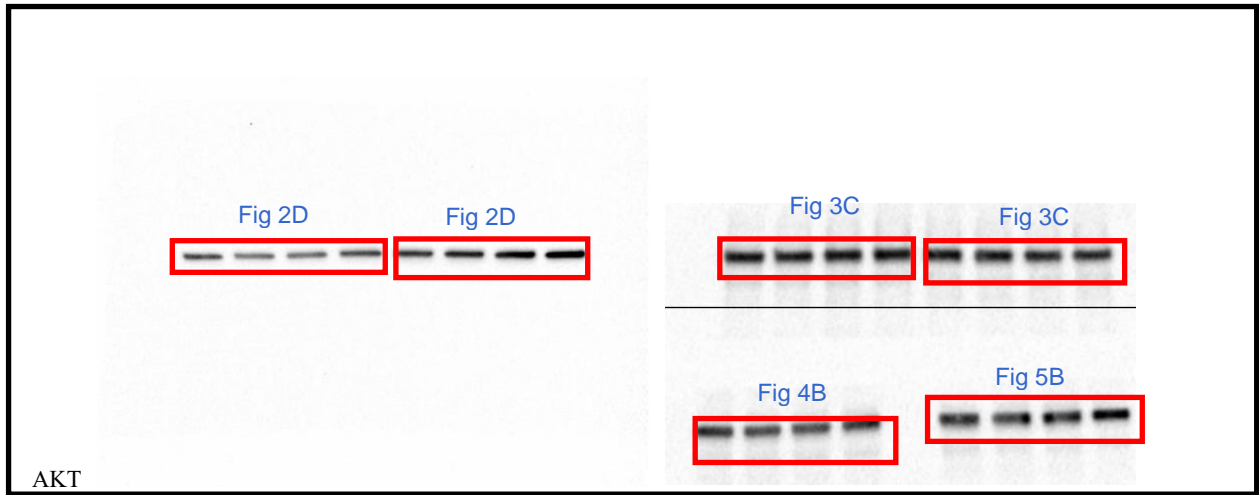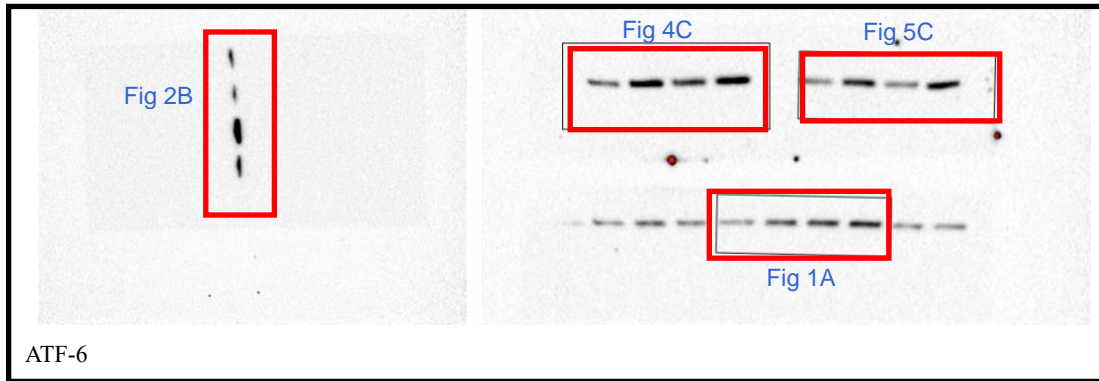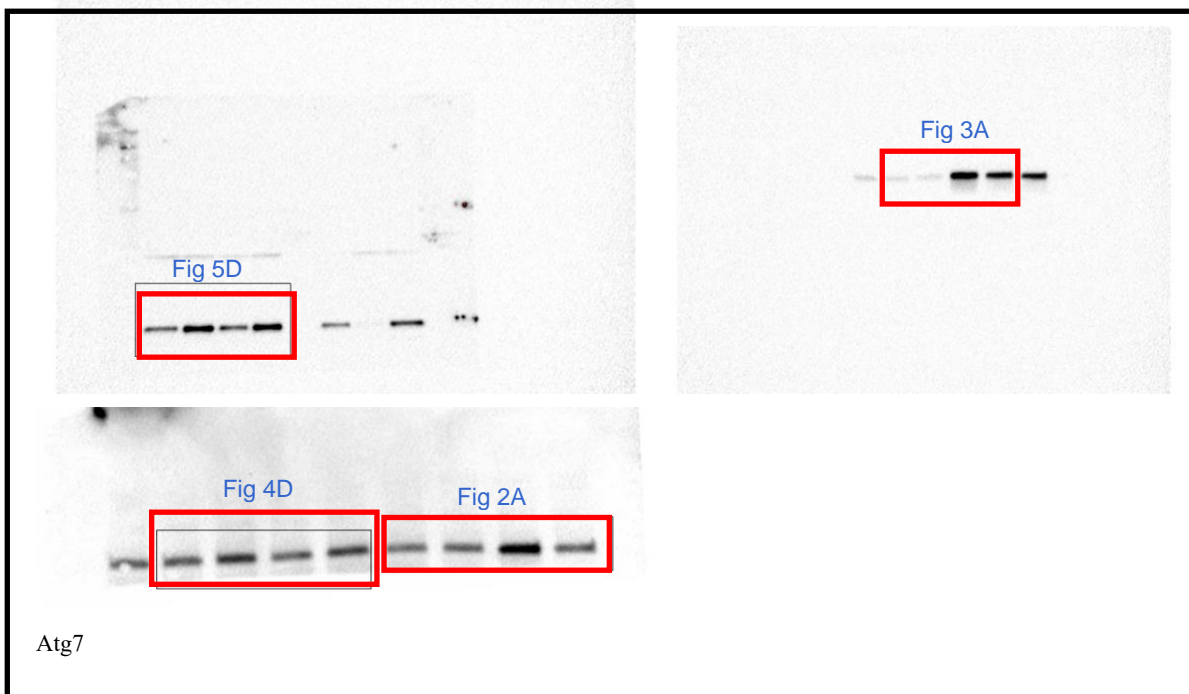

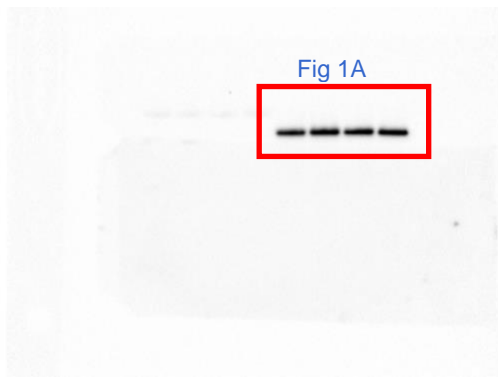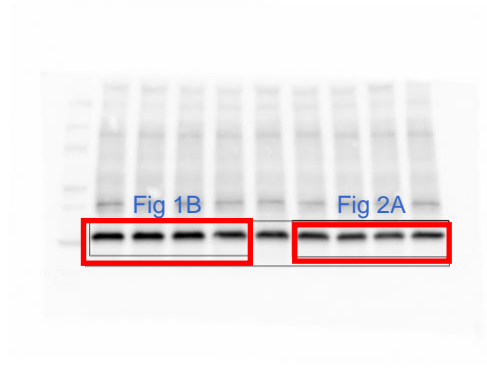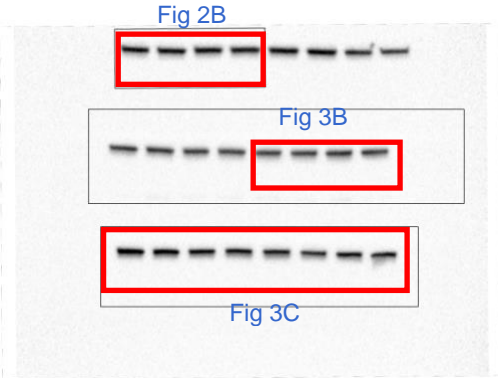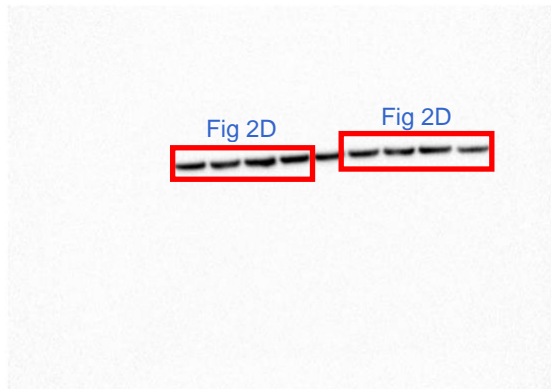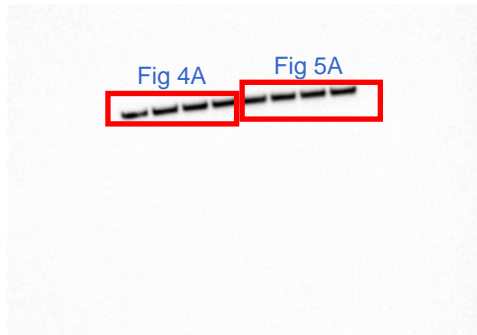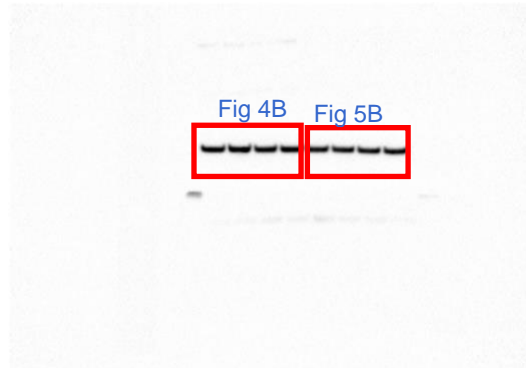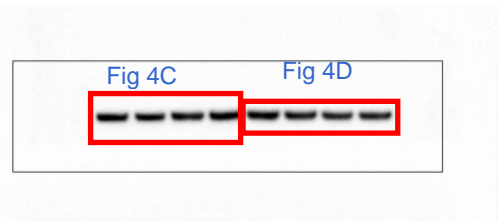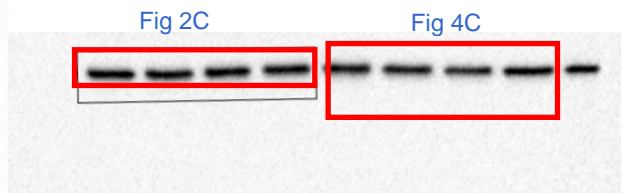

GAPDH

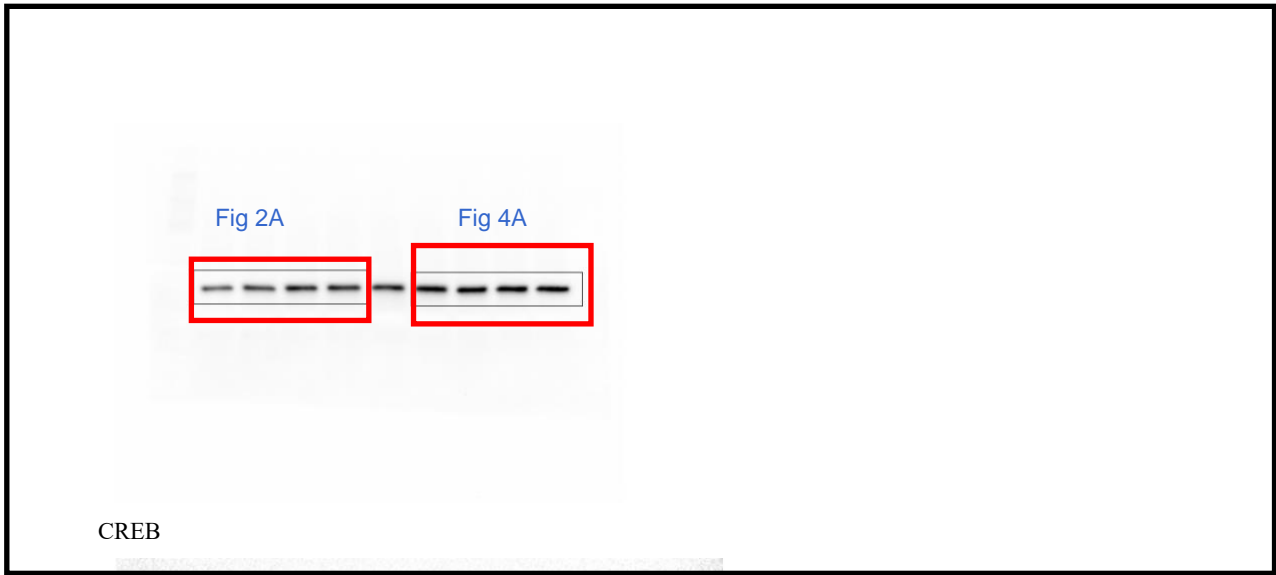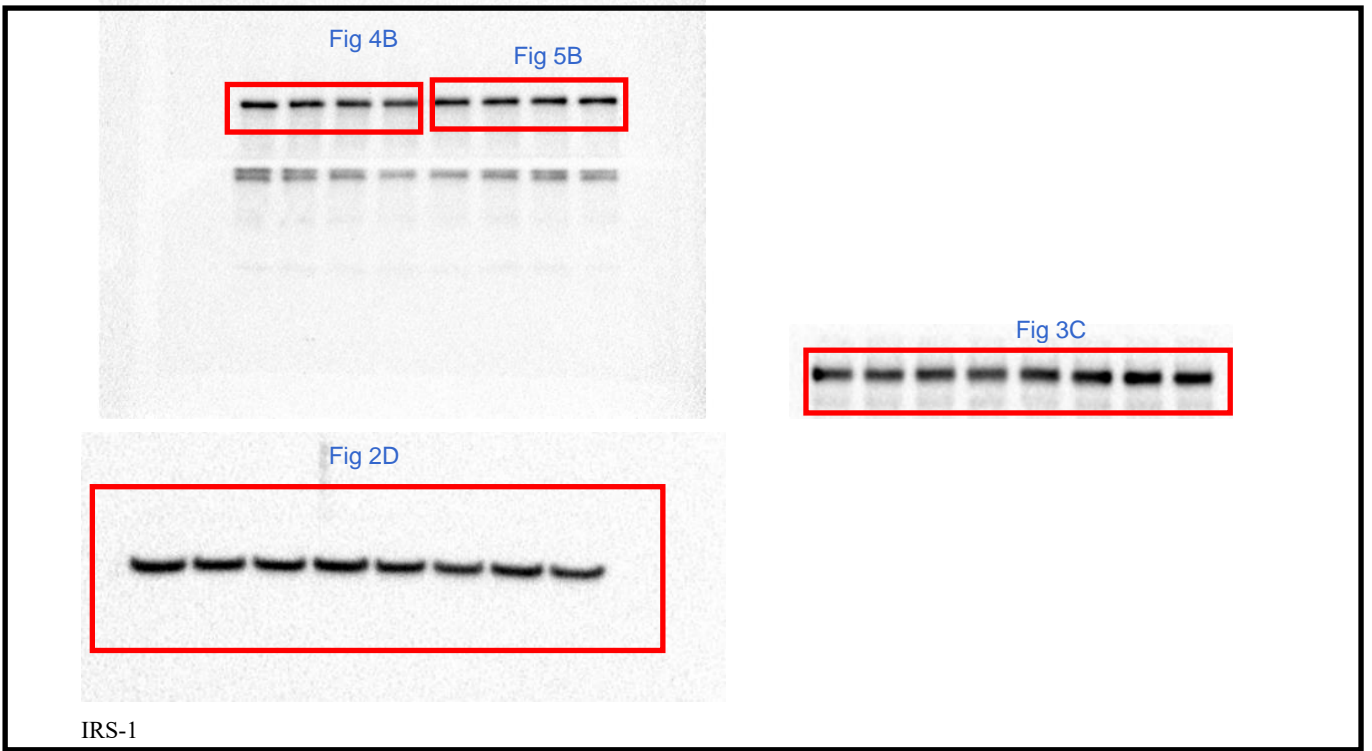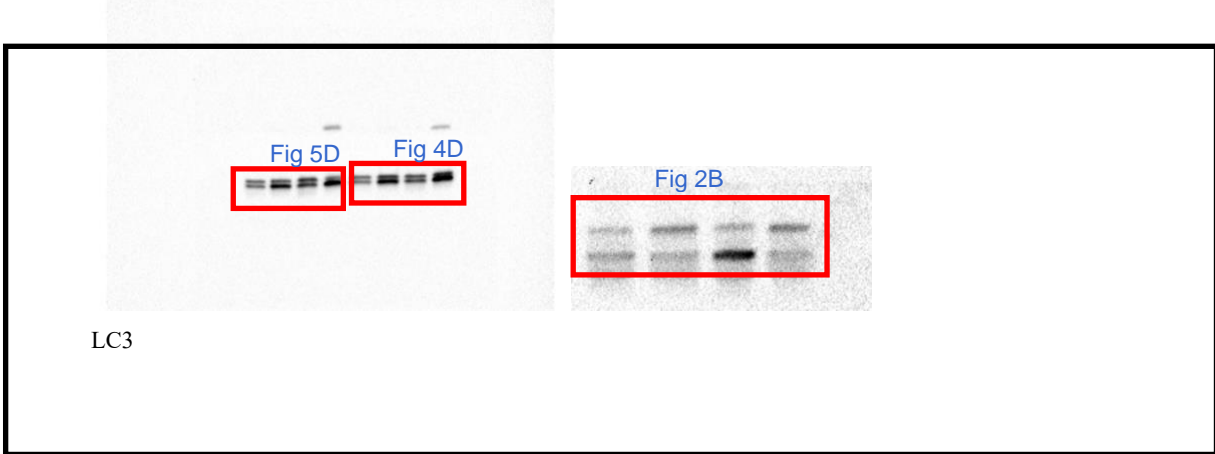

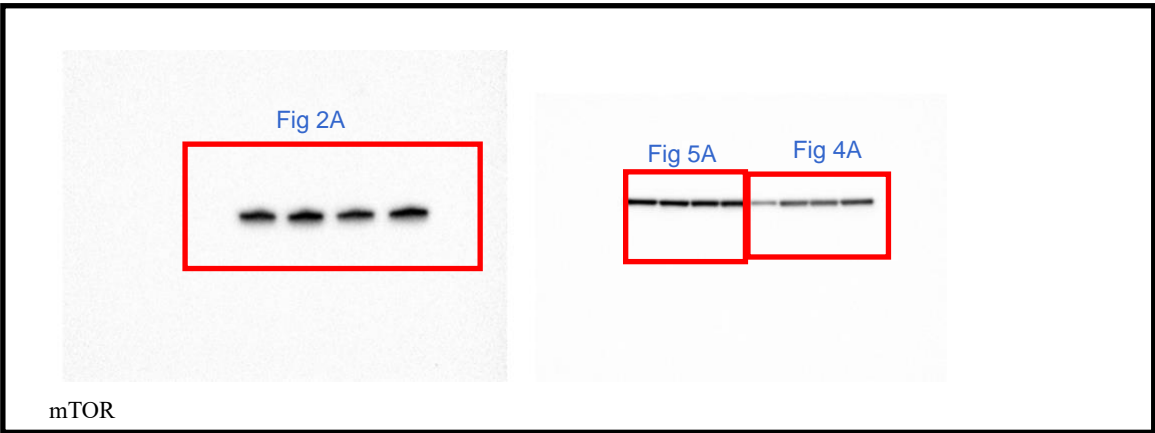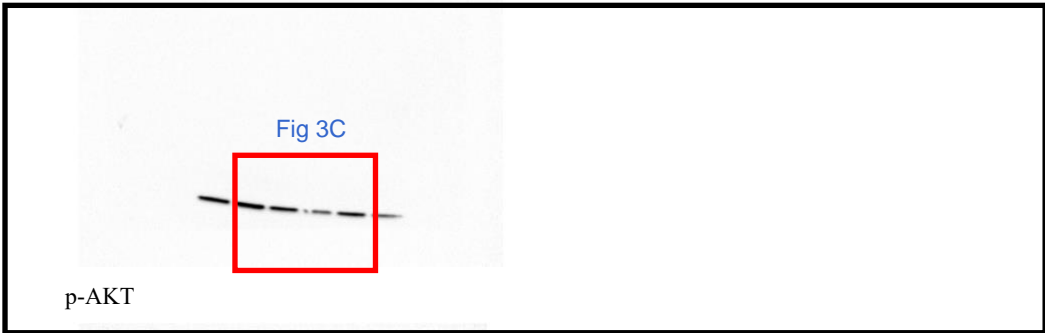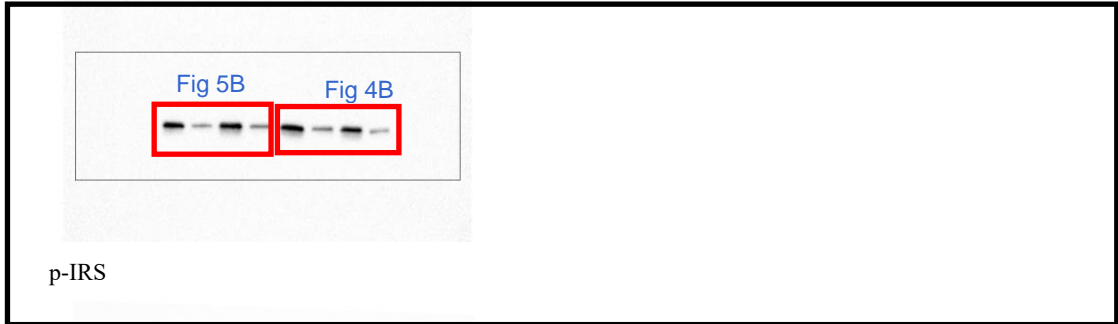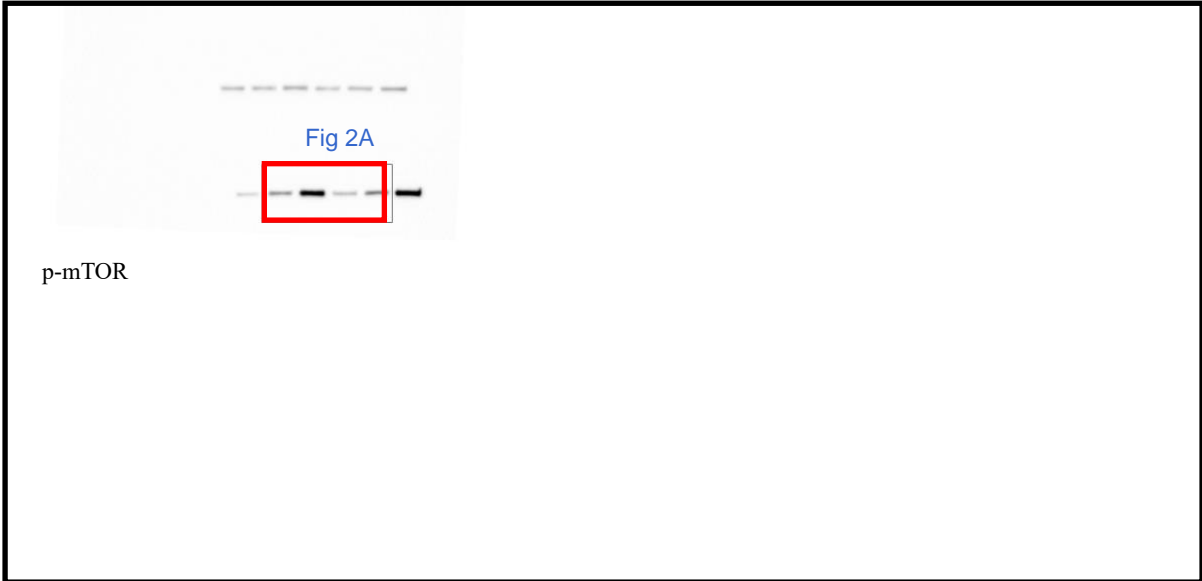

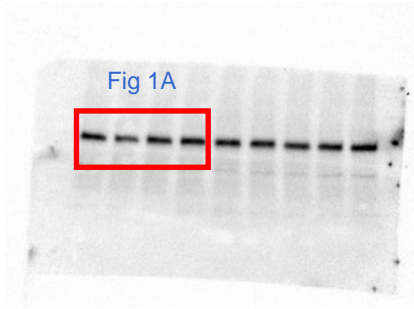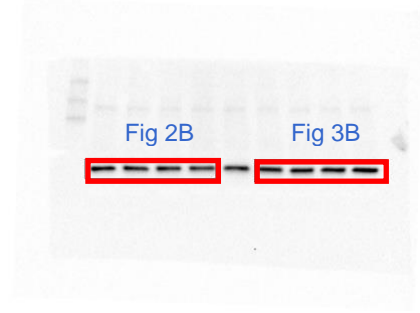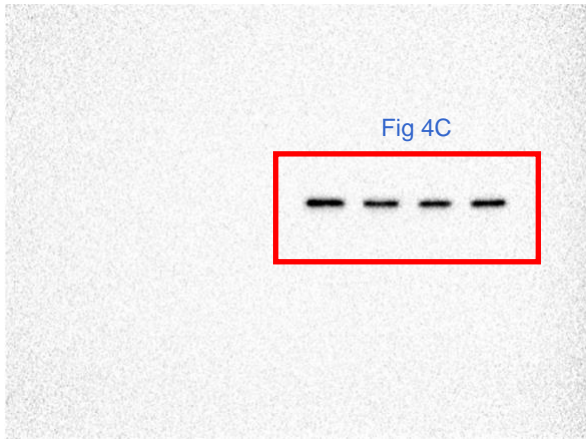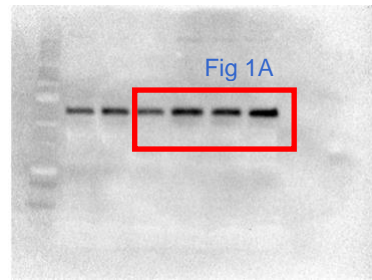

PERK
